# Supplementary material for: Diversity and Abundance of Roadkilled Bats in the Brazilian Atlantic Forest
Source: MDPI journal article supplement (doi:10.3390/d13070335), 2021-07-20
Supplement: s1 [file s1]

Table S3. Studies of roadkilled bats worldwide. Shows the country, road extension, monitoring type, and roadkill rate (individual/km/day) from each study when informed. No information is represented by ni.

| Author                         | Country        | Road extension (km) | Number of species | Monitoring type | Individual records | Number of monitoring days | Rate  |
|--------------------------------|----------------|---------------------|-------------------|-----------------|--------------------|---------------------------|-------|
| Gonzalez-Prieto et al., (1993) | Spain          | 17                  | 5                 | foot            | 72                 | ni                        | ni    |
| Rackow et al., (1994)          | Germany        | ni                  | 12                | incidental      | 61                 | ni                        | ni    |
| Kiefer et al., (1995)          | Germany        | ni                  | 22                | ni              | 96                 | ni                        | ni    |
| Haensel and Rackow, (1996)     | Germany        | ni                  | 18                | incidental      | 61                 | ni                        | ni    |
| Bafaluy, 2000                  | Spain          | 421                 | 12                | car             | 42                 | ni                        | ni    |
| Capo et al., (2006)            | France         | ni                  | 12                | foot            | 109                | ni                        | ni    |
| Lesinski, (2007)               | Poland         | 8                   | 11                | ni              | 112                | ni                        | ni    |
|                                |                | ni                  | 12                | ni              | 55                 | ni                        | ni    |
| Lesinski, (2008)               | Poland         | 1                   | >2                | foot            | 52                 | ni                        | ni    |
| Gaisler et al., (2009)         | Czech Republic | 8                   | 11                | foot            | 119                | 25                        | ni    |
| Russel et al., (2009)          | USA            | 4.4                 | 2                 | foot            | 29                 | ni                        | ni    |
| Lesinski et al., (2011)        | Poland         | 10                  | 7                 | foot            | 57                 | 30                        | ni    |
|                                |                | 6.6                 |                   | car             |                    | 21                        | ni    |
| Medinas et al., (2013)         | Portugal       | 51                  | 11                | car             | 154                | ni                        | ni    |
| Ikovic et al., (2014)          | Montenegro     | 30                  | 7                 | bike            | 17                 | ni                        | ni    |
| Parise, (2014)                 | France         | 1.5                 | 2                 | foot            | 3                  | 18                        | ni    |
|                                |                | 1                   | 2                 |                 | 2                  | 15                        | ni    |
| Alves et al., (2015)           | Brazil         | 32                  | 4                 | moto/foot       | 13                 | 21                        | 0.024 |

|                              |          |     |    |        |     |     |        |
|------------------------------|----------|-----|----|--------|-----|-----|--------|
| Ceron et al., (2017)         | Brazil   | 131 | 6  | car    | 11  | 27  | ni     |
|                              |          | 15  |    | bike   |     | 27  | ni     |
| Secco et al., (2017)         | Brazil   | 71  | 9  | car    | 65  | 74  | 0.01   |
| Novaes et al., (2018)        | Brazil   | ni  | 44 | review | 415 | ni  | ni     |
| Stoianova et al., (2019)     | Bulgaria | 16  | 10 | ni     | 78  | ni  | ni     |
| Ramalho et al., (2021)       | Brazil   | 114 | 6  | car    | 87  | 484 | 0.0016 |
| Damasio et al., (this study) | Brazil   | 5.1 | 47 | foot   | 592 | 969 | 0.1200 |
|                              |          | 6   |    | foot   | 33  | 38  | 0.1450 |
|                              |          | 25  |    | car    | 55  | 208 | 0.0106 |
