# Supplementary material for: Diversity and Abundance of Roadkilled Bats in the Brazilian Atlantic Forest
Source: MDPI journal article supplement (doi:10.3390/d13070335), 2021-07-20
Supplement: s1 [file s1]

Table S1. Values of the Wilcoxon non-parametric test (Z) and level of significance (p) when comparing the roadkill data with the captured specimen list with mist nets (Pimenta, 2013 and Gnocchi et al., 2019). In the last comparison, we removed the records of the Phyllostomidae family. The value in parentheses corresponds to the sample size. Sooretama Biological Reserve (SBR) and Vale Nature Reserve (VNR).

| Monitoring type       | SBR             |         | VNR             |        | SBR + VNR       |         |
|-----------------------|-----------------|---------|-----------------|--------|-----------------|---------|
|                       | Z               | p       | Z               | p      | Z               | p       |
| By genus / species    |                 |         |                 |        |                 |         |
| On foot               | -3.2892<br>(38) | 0.0010  | -3.7885<br>(24) | 0.0002 | -3.6540<br>(40) | 0.0003  |
| Car                   | -5.0307<br>(34) | <0.0001 |                 |        | -5.2364<br>(36) | <0.0001 |
| Sporadic              | -4.7307<br>(36) | <0.0001 | -3.9254<br>(20) | 0.0001 | -5.0859<br>(37) | <0.0001 |
| Foot + Car            | -3.1945<br>(38) | 0.0014  |                 |        | -3.5865<br>(40) | 0.0003  |
| Foot + Car + Sporadic | -2.8780<br>(39) | 0.0040  | -3.7885<br>(24) | 0.0002 | -3.2633<br>(41) | 0.0011  |
| By Family             |                 |         |                 |        |                 |         |
| On foot               | -1.5724         | 0.1159  | -1.6255<br>(6)  | 0.1041 | -1.5724<br>(6)  | 0.1159  |
| Car                   | -1.8257         | 0.0679  |                 |        | -2.0226<br>(5)  | 0.0431  |
| Sporadic              | -1.7529         | 0.0796  | -2.0319<br>(5)  | 0.0422 | -1.8257<br>(5)  | 0.0679  |
| Foot + Car            | -1.5724         | 0.1159  |                 |        | -1.5724<br>(6)  | 0.1159  |
| Foot + Car + Sporadic | -1.3628         | 0.1730  | -1.6255<br>(7)  | 0.1041 | -1.4716<br>(6)  | 0.1411  |
| By guild              |                 |         |                 |        |                 |         |
| On foot               | -2.3664<br>(7)  | 0.0180  | -2.3707<br>(7)  | 0.0178 | -2.3664<br>(7)  | 0.0180  |
| Car                   | -2.3707<br>(7)  | 0.0178  |                 |        | -2.3707<br>(7)  | 0.0178  |
| Sporadic              | -2.3664<br>(7)  | 0.0180  | -2.3707<br>(7)  | 0.0178 | -2.3664<br>(7)  | 0.0180  |
| Foot + Car            | -2.3664<br>(7)  | 0.0180  |                 |        | -2.3664<br>(7)  | 0.0180  |
| Foot + Car + Sporadic | -2.3664<br>(7)  | 0.0180  | -2.3707<br>(7)  | 0.0178 | -2.3664<br>(7)  | 0.0180  |
| By flight             |                 |         |                 |        |                 |         |
| On foot               | -1.6036<br>(3)  | 0.1088  | -1.6036<br>(3)  | 0.1088 | -1.6036<br>(3)  | 0.1088  |
| Car                   | -1.6036<br>(3)  |         |                 |        | -1.6036<br>(3)  | 0.1088  |
| Sporadic              | -1.6036<br>(3)  | 0.1088  | -1.6036<br>(3)  | 0.1088 | -1.6036<br>(3)  | 0.1088  |

|                                                    |                 |        |                |        |                 |        |
|----------------------------------------------------|-----------------|--------|----------------|--------|-----------------|--------|
| Foot + Car                                         | -1.6036<br>(3)  | 0.1088 |                |        | -1.6036<br>(3)  | 0.1088 |
| Foot + Car + Sporadic                              | -1.6036<br>(3)  | 0.1088 | -1.6036<br>(3) | 0.1088 | -1.6036<br>(3)  | 0.1088 |
| Monitoring type                                    | SBR             |        | VNR            |        | SBR + VNR       |        |
|                                                    | Z               | p      | Z              | p      | Z               | p      |
| By guild and flight                                |                 |        |                |        |                 |        |
| On foot                                            | -2.5205<br>(8)  | 0.0117 | -2.5236<br>(8) | 0.0106 | -2.5205<br>(8)  | 0.0117 |
| Car                                                | -2.5236<br>(8)  | 0.0116 |                |        | -2.5236<br>(8)  | 0.0116 |
| Sporadic                                           | -2.5205<br>(8)  | 0.0117 | -2.5236<br>(8) | 0.0116 | -2.5205<br>(8)  | 0.0117 |
| Foot + Car                                         | -2.5205<br>(8)  | 0.0117 |                |        | -2.5205<br>(8)  | 0.0117 |
| Foot + Car + Sporadic                              | -2.5205<br>(8)  | 0.0117 | -2.5236<br>(8) | 0.0116 | -2.5205<br>(8)  | 0.0117 |
| By species/genus without the family Phyllostomidae |                 |        |                |        |                 |        |
| On foot                                            | -0.5249<br>(13) | 0.5996 | -1.2923<br>(8) | 0.1962 | -0.6999<br>(13) | 0.4840 |
| Car                                                | -2.6679<br>(9)  | 0.0076 |                |        | -2.8067<br>(10) | 0.0050 |
| Sporadic                                           | -2.2014<br>(9)  | 0.0277 | -2.0319<br>(5) | 0.0422 | -2.4394<br>(8)  | 0.0147 |
| Foot + Car                                         | -0.4552<br>(13) | 0.6489 |                |        | -0.6299<br>(13) | 0.5287 |
| Foot + Car + Sporadic                              | -0.3500<br>(13) | 0.7264 | -1.2923<br>(8) | 0.1962 | -0.4895<br>(13) | 0.6245 |
