# Supplementary material for: Diversity and Abundance of Roadkilled Bats in the Brazilian Atlantic Forest
Source: MDPI journal article supplement (doi:10.3390/d13070335), 2021-07-20
Supplement: s1 [file s1]

Table S2. Results of the “Tukey test with comparisons between periods: No Radar, Installed Radar, Operation Radar1 and Operation Radar2.

|                                     | Estimate | Std. Error | t value | P value   |
|-------------------------------------|----------|------------|---------|-----------|
| No Radar - Installed Radar          | 0.10717  | 0.03534    | 3.033   | 0.01738 * |
| Operation Radar1 - Installed Radar  | -0.03165 | 0.03444    | -0.919  | 0.79485   |
| Operation Radar2 - Installed Radar  | 0.06663  | 0.03444    | 1.934   | 0.22216   |
| Operation Radar1 - No Radar         | -0.13882 | 0.03534    | -3.928  | 0.00102 * |
| Operation Radar2 - No Radar         | -0.04054 | 0.03534    | -1.147  | 0.66158   |
| Operation Radar2 - Operation Radar1 | 0.09828  | 0.03444    | 2.853   | 0.02744 * |

\*  $p < 0.05$
